# Supplementary material
Source: publisher figshare collection journal article supplement (https://wellcome.figshare.com/ndownloader/files/24952568)
Supplement: Supplementary file 1 [file 24952568]

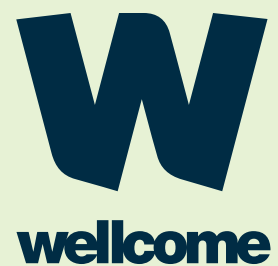

# Open Access @ Wellcome

**Researchers and research administrators  
meeting Autumn 2020**



# Agenda

## **Part 1: OA overview [Robert Kiley]**

- Why Wellcome supports Open Access [OA]
- OA 2021: policy summary and what has changed
- Routes to OA

## **Part 2: Supporting our researchers [Hannah Hope]**

- JCT: an overview, including data sources and timeline

## **Part 3: Funding OA [Margaret Hurley]**

- OA block grants
- Supporting Transformative Agreements

## **Q&A [All – Questions via the Q&A function]**

# Why we support OA (1)

- We want all research articles to be openly accessible on publication
  - And we are a long way from that goal

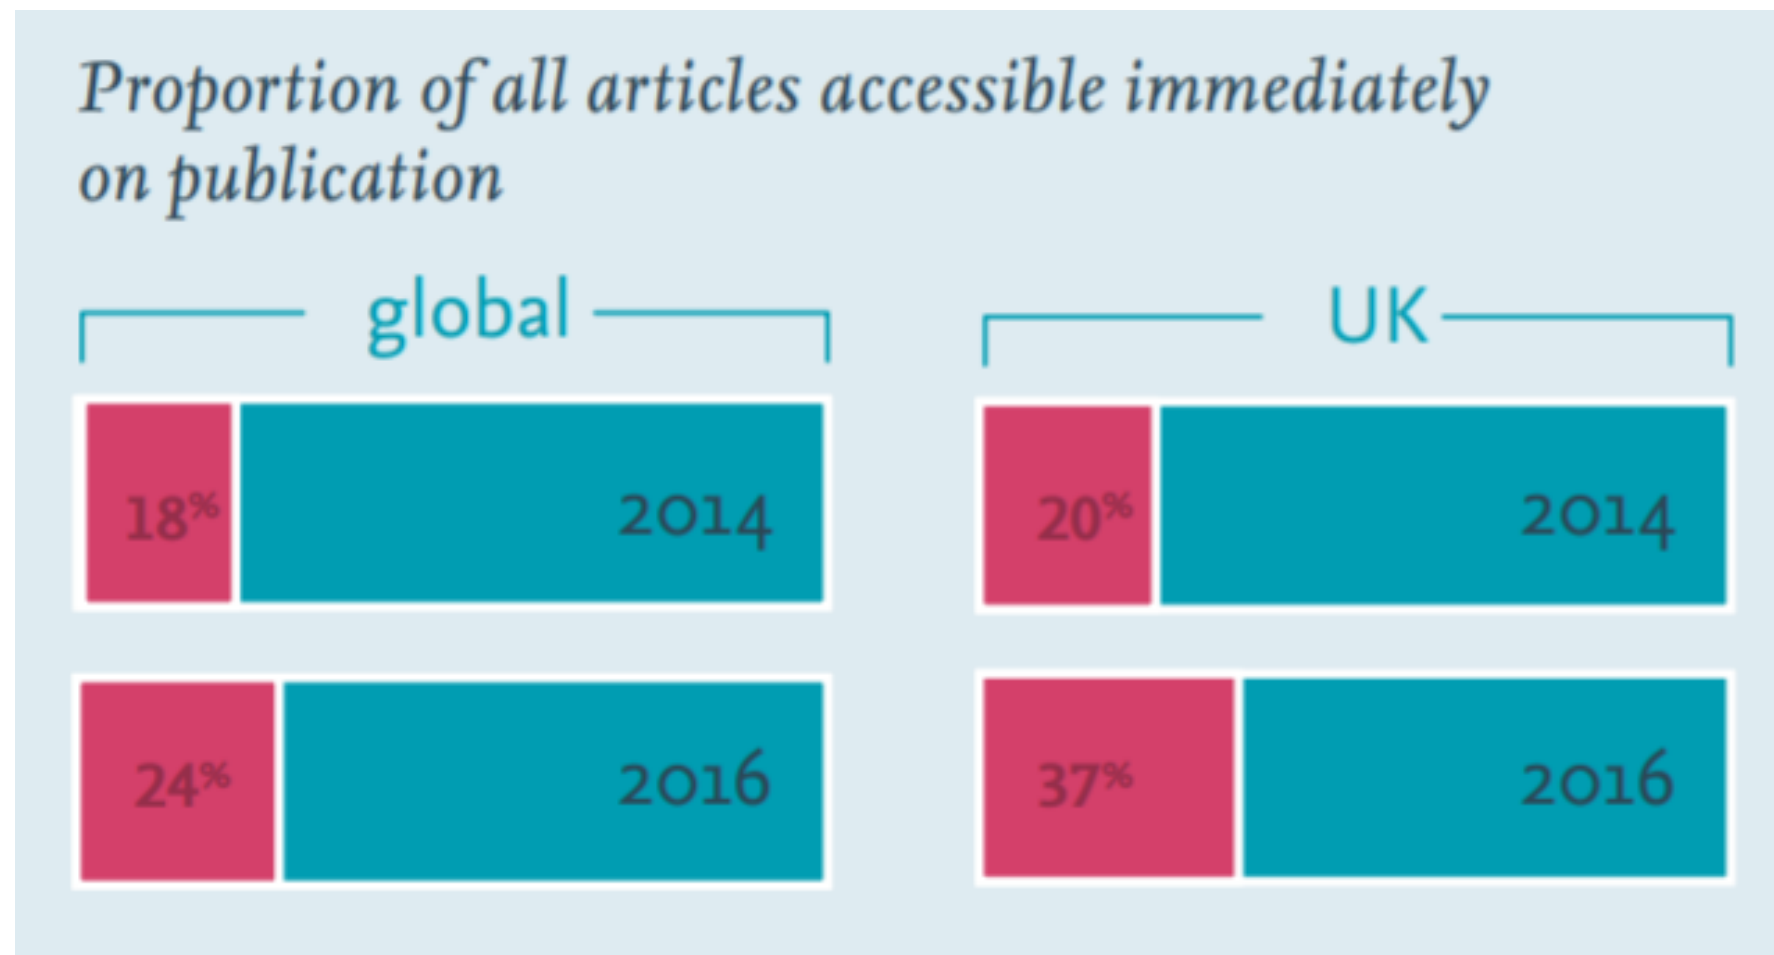

Source: [Monitoring the transition to open access](#): December 2017, UUK

# Why we support OA (2)

- We want all research articles to be fully reusable
  - With more than 2m research articles being published each year we need to be able to use AI/TDM technologies to uncover new knowledge, in all disciplines

## EXPLOSIVE GROWTH

Since 1 January, nearly 30,000 articles on COVID-19 have been published, according to the the NIH's COVID-19 Portfolio.

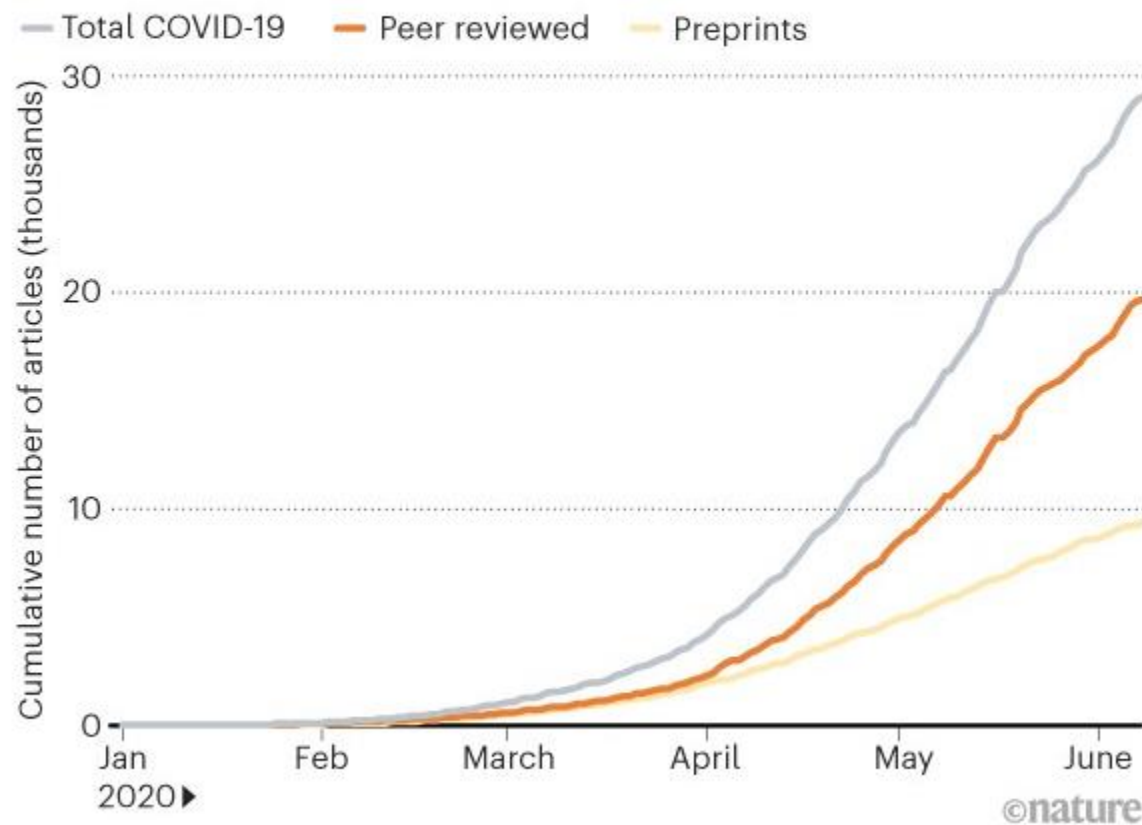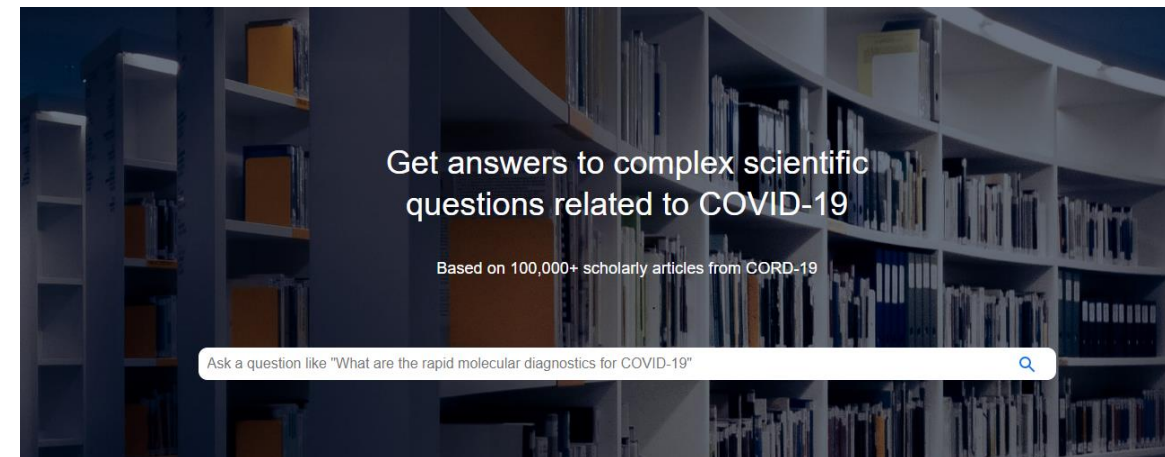

<https://covid19-research-explorer.appspot.com/>

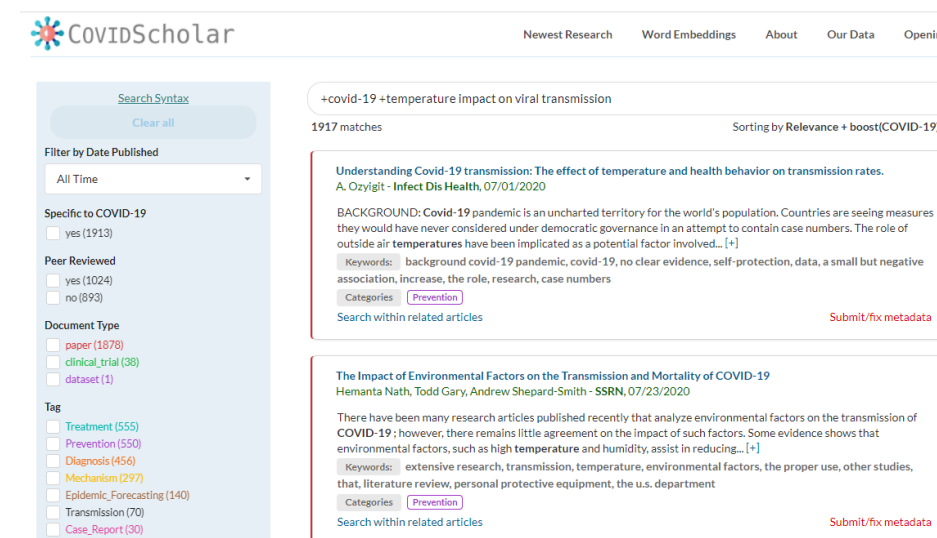

<https://covid19-research-explorer.appspot.com/>

# Why we support OA (3)

- **We want to accelerate the transition to OA**
  - **Having supported hybrid OA for more than 15 years, we see little evidence that this is leading to a transition to OA**

| Publisher | Current number of subscription journals | Number of subscription titles flipped to OA |
|-----------|-----------------------------------------|---------------------------------------------|
| Elsevier  | Approx. 2400 titles                     | 69                                          |
| Wiley     | Approx. 1600 titles                     | 23                                          |
| Springer  | Approx. 1900 titles                     | 19                                          |

# OA policy: summary

- **All original research articles supported in whole, or in part, by Wellcome must be:**
  - made freely available through PubMed Central (PMC) and Europe PMC by the official final **publication date**

## And

- published under a Creative Commons attribution licence (**CC BY**), unless we have agreed, as an exception, to allow publication under a CC BY-ND licence.
- **Policy applies to all research articles submitted for publication from 1 January 2021**

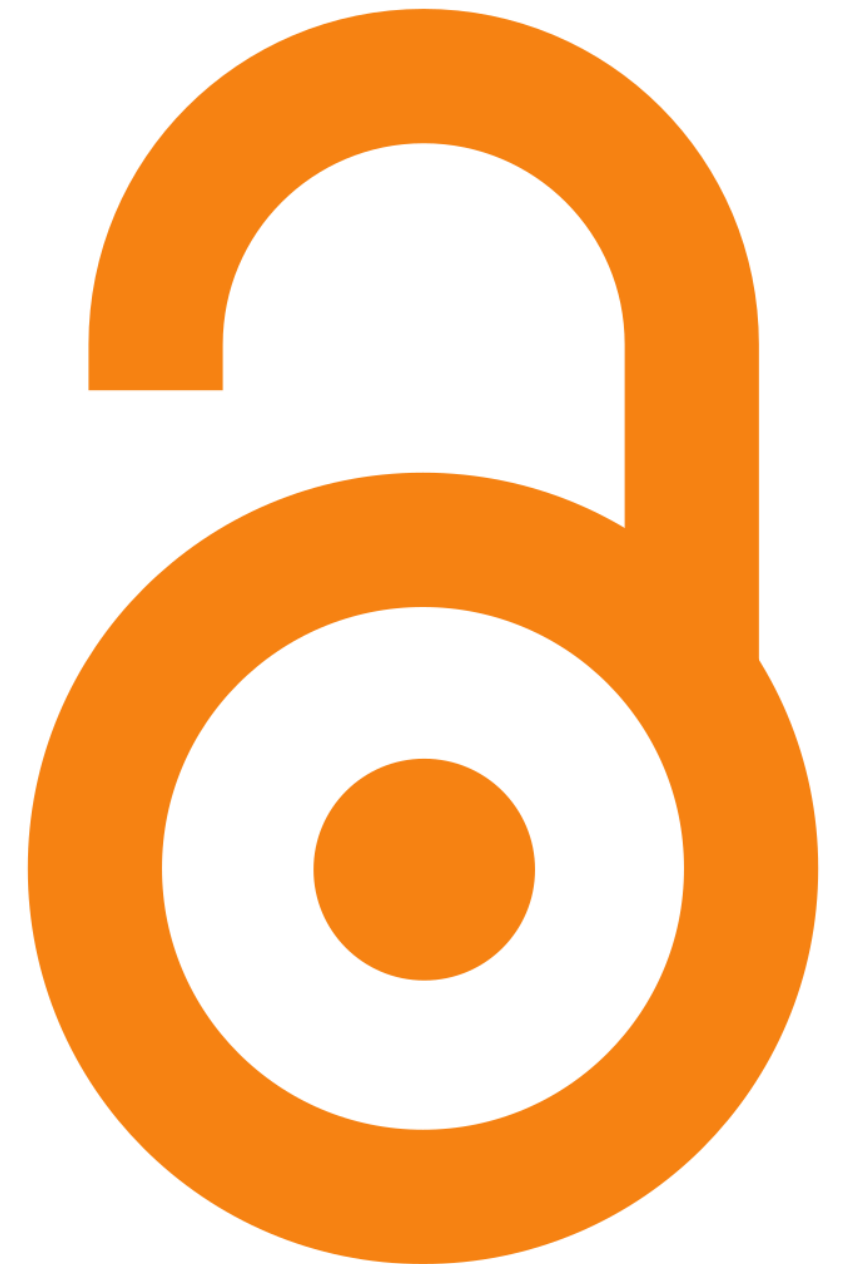

# OA policy: other elements

- All research articles supported in whole, or in part, by Wellcome must include a **statement** explaining how other researchers can access any **data, original software or materials** underpinning the research
- We are committed to making sure that when we assess research outputs during funding decisions, we consider the **intrinsic merit of the work**, not the title of the journal or publisher. All Wellcome-funded institutions have to commit to this principle
- Researchers and organisations who do not comply with the OA policy will be subject to appropriate **sanctions**. These may include Wellcome:
  - > not accepting new grant applications
  - > suspending funding to organisations in extreme cases

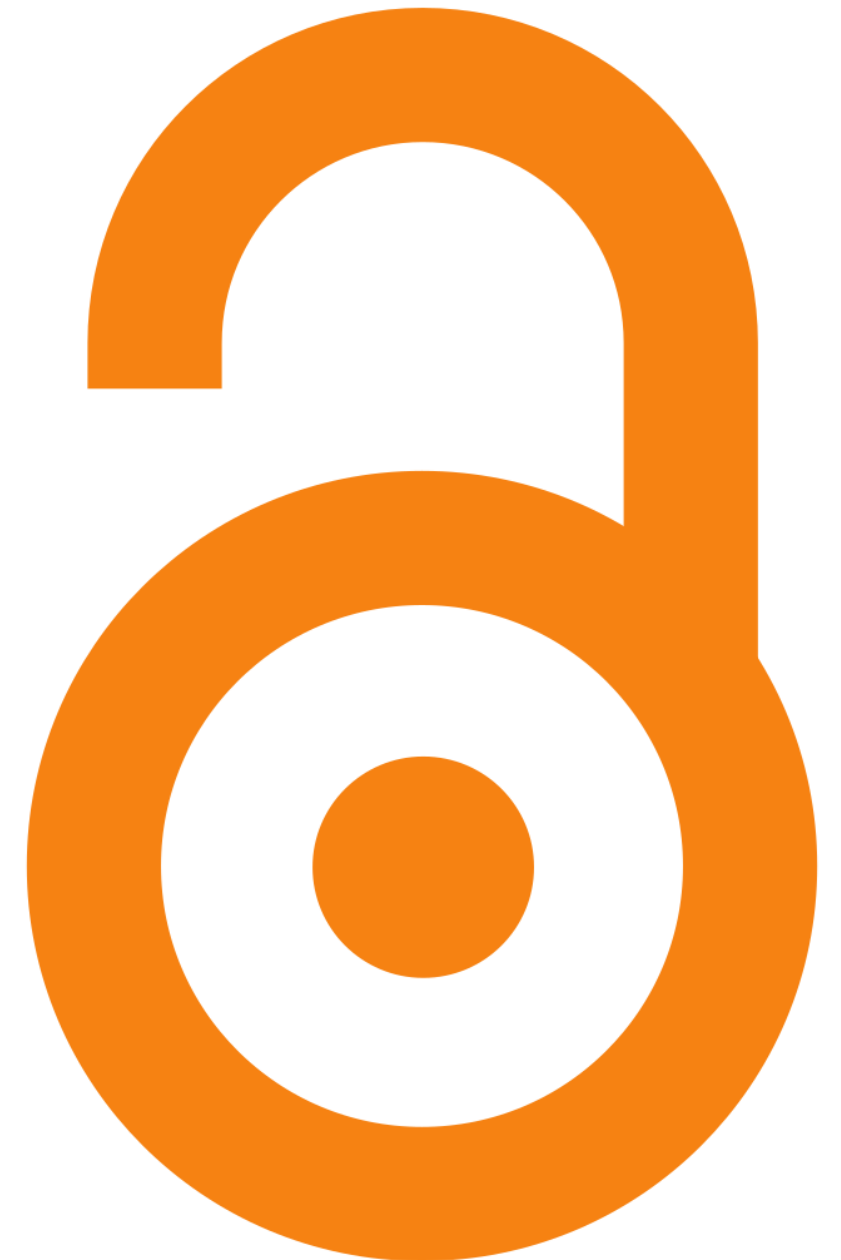

# What's changed?

| New OA policy                                                                                                                                             | Previous OA policy                                      |
|-----------------------------------------------------------------------------------------------------------------------------------------------------------|---------------------------------------------------------|
| No embargoes accepted                                                                                                                                     | <i>Previously accommodated a 6-month embargo</i>        |
| All research articles must be openly licensed                                                                                                             | <i>Previously this was only when we paid an APC</i>     |
| No longer funding APCs in subscription/hybrid journals– unless part of a transformative arrangement)                                                      | <i>Previously we paid APCs in subscription journals</i> |
| New grant condition added such that all grantholders automatically grant a CC BY public copyright licence to all their future Author Accepted Manuscripts | <i>No equivalent grant condition</i>                    |



# OA policy: aligned with Plan S

## National funders

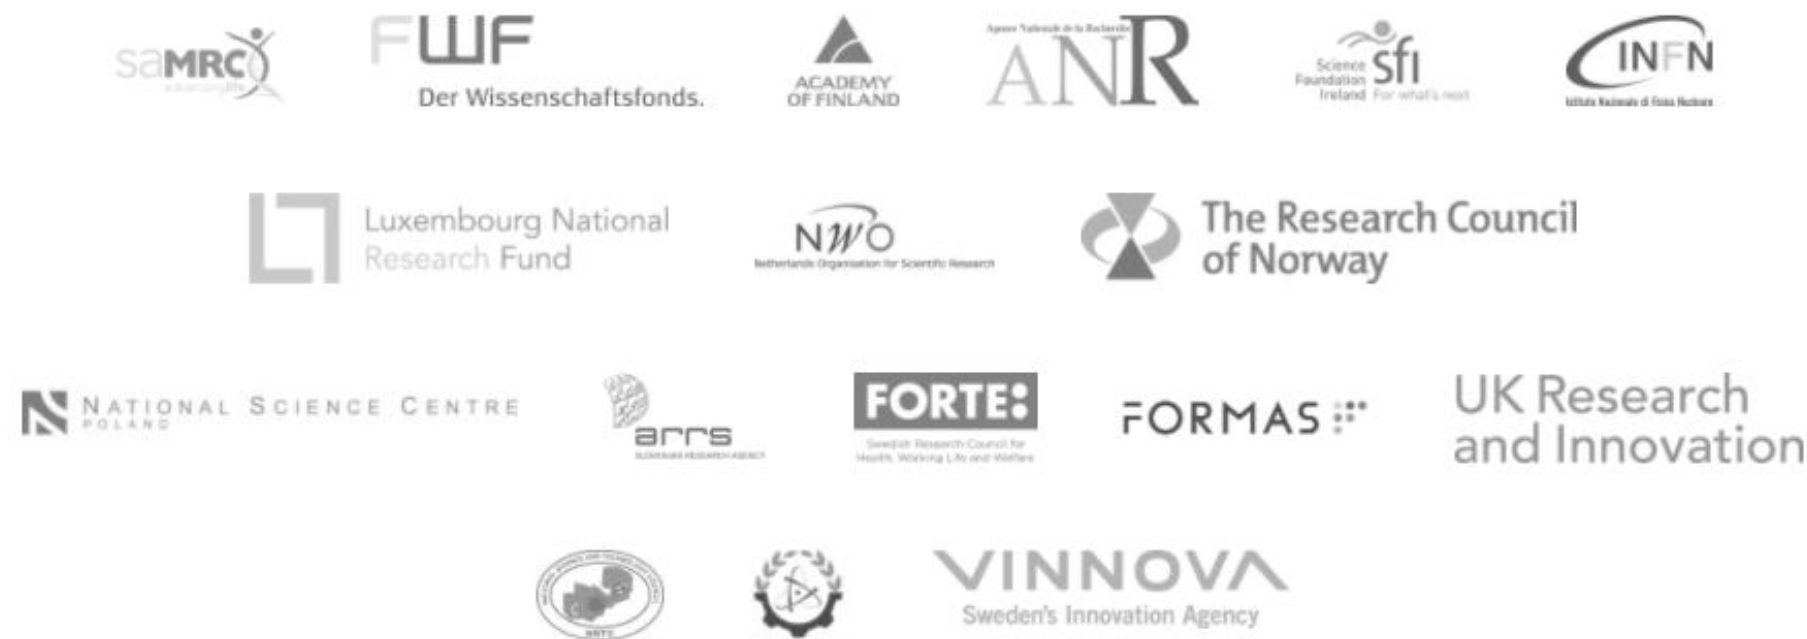

## Charitable & international funders

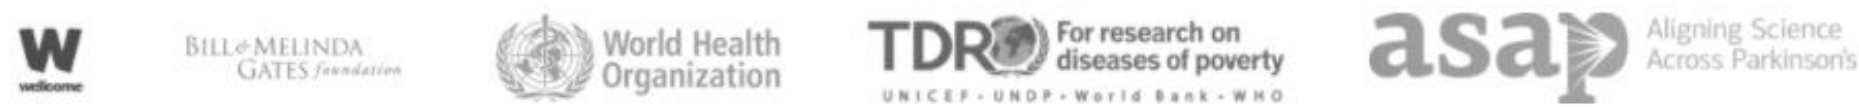

## European funders

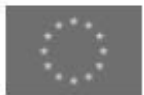

# Routes to Open Access

|             | Route 1                                                                  | Route 2                                                                                                                     | Route 3                                                                                          |
|-------------|--------------------------------------------------------------------------|-----------------------------------------------------------------------------------------------------------------------------|--------------------------------------------------------------------------------------------------|
|             | Open Access publishing venues (journals or platforms)                    | Subscription venues (repository route)                                                                                      | Transition of subscription venues (transformative arrangements)                                  |
| Description | Authors publish in an Open Access journal or on an Open Access platform. | Authors publish in a subscription journal and make the Author's Accepted Manuscript (AAM) openly available in a repository. | Authors publish Open Access in a subscription journal under a transformative arrangement.        |
| Funding     | Wellcome will financially support publication fees.                      | Wellcome will <u>not</u> financially support 'hybrid' Open Access publication fees in subscription venues.                  | Wellcome will financially contribute to the cost of these arrangements at the institution level. |

# Route 1 – Publish in an OA journal/platform

- Publish in any fully OA journal, indexed by Directory of OA Journals (DOAJ)
- Examples include eLife, PLOS, Nature Communications, Wellcome Open Research etc etc.
- OA fee will be met by Wellcome

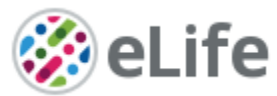

Wellcome Open Research

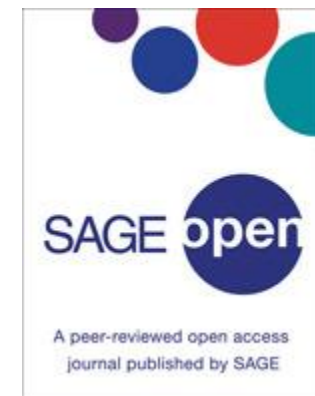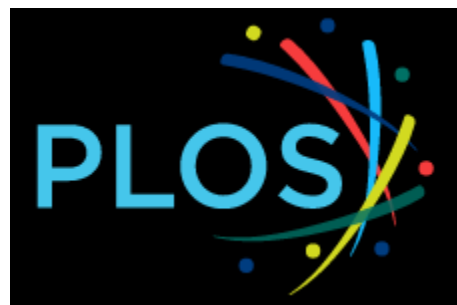

BMJ Open

nature communications

 **BMC** Part of Springer Nature

## Route 2 – The repository route

- Publish in any peer reviewed journal and make the **Author Accepted Manuscript** (AAM), in Europe PMC at the time of publication with a CC BY licence. The updated grant conditions give you the right to do so.
- As the CC BY licence to the future AAM was already in place, prior to the publication agreement with the author, **that prior CC BY licence will trump any conflicting language in the publication agreement**
- We require you to include the following statement on all submissions of original research to peer-reviewed journals:

*'This research was funded in whole, or in part, by the Wellcome Trust [Grant number]. **For the purpose of Open Access, the author has applied a CC BY public copyright licence to any Author Accepted Manuscript version arising from this submission.***

- Deposit your AAMs at Europe PMC plus
- In cases where the **Version of Record** is made OA (Routes 1 and 3) there is no need to deposit the AAM at Europe PMC

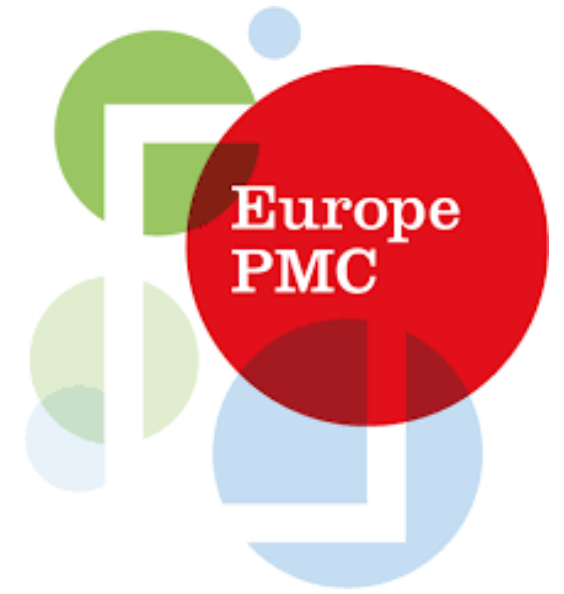

 Europe PMC plus | [manuscript submission system](https://plus.europepmc.org/home)

<https://plus.europepmc.org/home>

# Route 3 – Transformative Arrangements

- Transformative Arrangements are publishing models where the subscription publisher is committed to transitioning to OA
- Various approaches supported including “Read and Publish”, “Subscribe to Open” and “Transformative Journals”
- In cases where these models are available to Wellcome funded researchers. we contribute to publishing costs.

## Jisc, UK institutions and Wiley agree ground-breaking deal

2 March 2020

The most extensive UK transitional agreement to date accelerates open access publishing and expands access to one of the most substantial collections of scholarly content.

Jisc and [Wiley](#), a global leader in research and education, have struck a four-year “read and publish” agreement that offers researchers at UK universities open access (OA) publishing in all Wiley journals at no cost to them.

## ***Nature* to join open-access Plan S, publisher says**

Springer Nature says it commits to offering researchers a route to publishing open access in *Nature* and most Nature-branded journals from 2021.

The Company of Biologists commits to the Transformative Journal approach

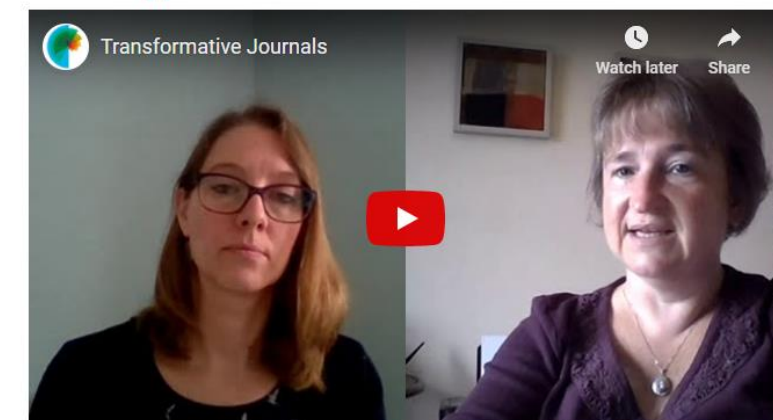

The Company of Biologists is the first not-for-profit publisher to commit to this approach. The Company's three hybrid journals – Development, Journal of Cell Science and Journal of Experimental Biology – have chosen the 'transformative' route towards



## Part 2: Journal Checker Tool

*Simplifying compliance for our funded researchers*

Hannah Hope



**JOURNAL CHECKER TOOL**

# Journal Checker Tool

- A web tool being developed by cOAlition S, to support all researchers who need to comply with a Plan S OA policy
- Aiming for global coverage of journals, starting with the 200 publishers that publish 95% of cOAlition S funded research (very close coverage to Wellcome's top 200)
- Goal to help researchers identify which of the routes to open access compliance is available to them

# How it will work

**Journal**      **+**      **Funder**      **+**      **Institution**      **=**

Does this combination enable the researcher to comply with Plan S and Wellcome's OA policy?

- Yes, instructions on which of the routes enable compliance
- No, suggest changes to search query to find combination that enables compliance



# How it will work

**Journal** + **Funder** + **Institution** =

Is the **journal** fully open access (Gold, Diamond, S2O)?

Is the **journal** in a Transformative Agreement, that the **institution** has subscribed to?

Is the **journal** a Transformative Journal?

Does the **journal** have a compliant self-archiving policy?

Is Rights Retention available to use?

# Journal Checker Tool

- Tool released early November, prior to January policy launch
- How you comply may change over time  
– check each time before you submit!

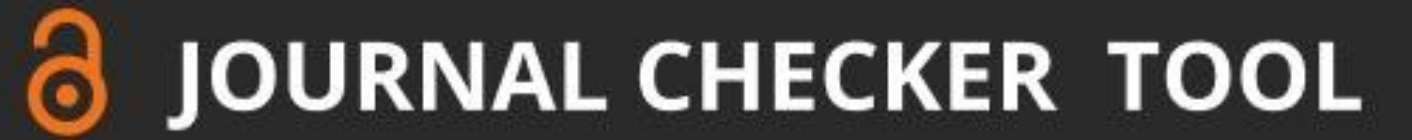



## Part 3: Funding OA

***Margaret Hurley***

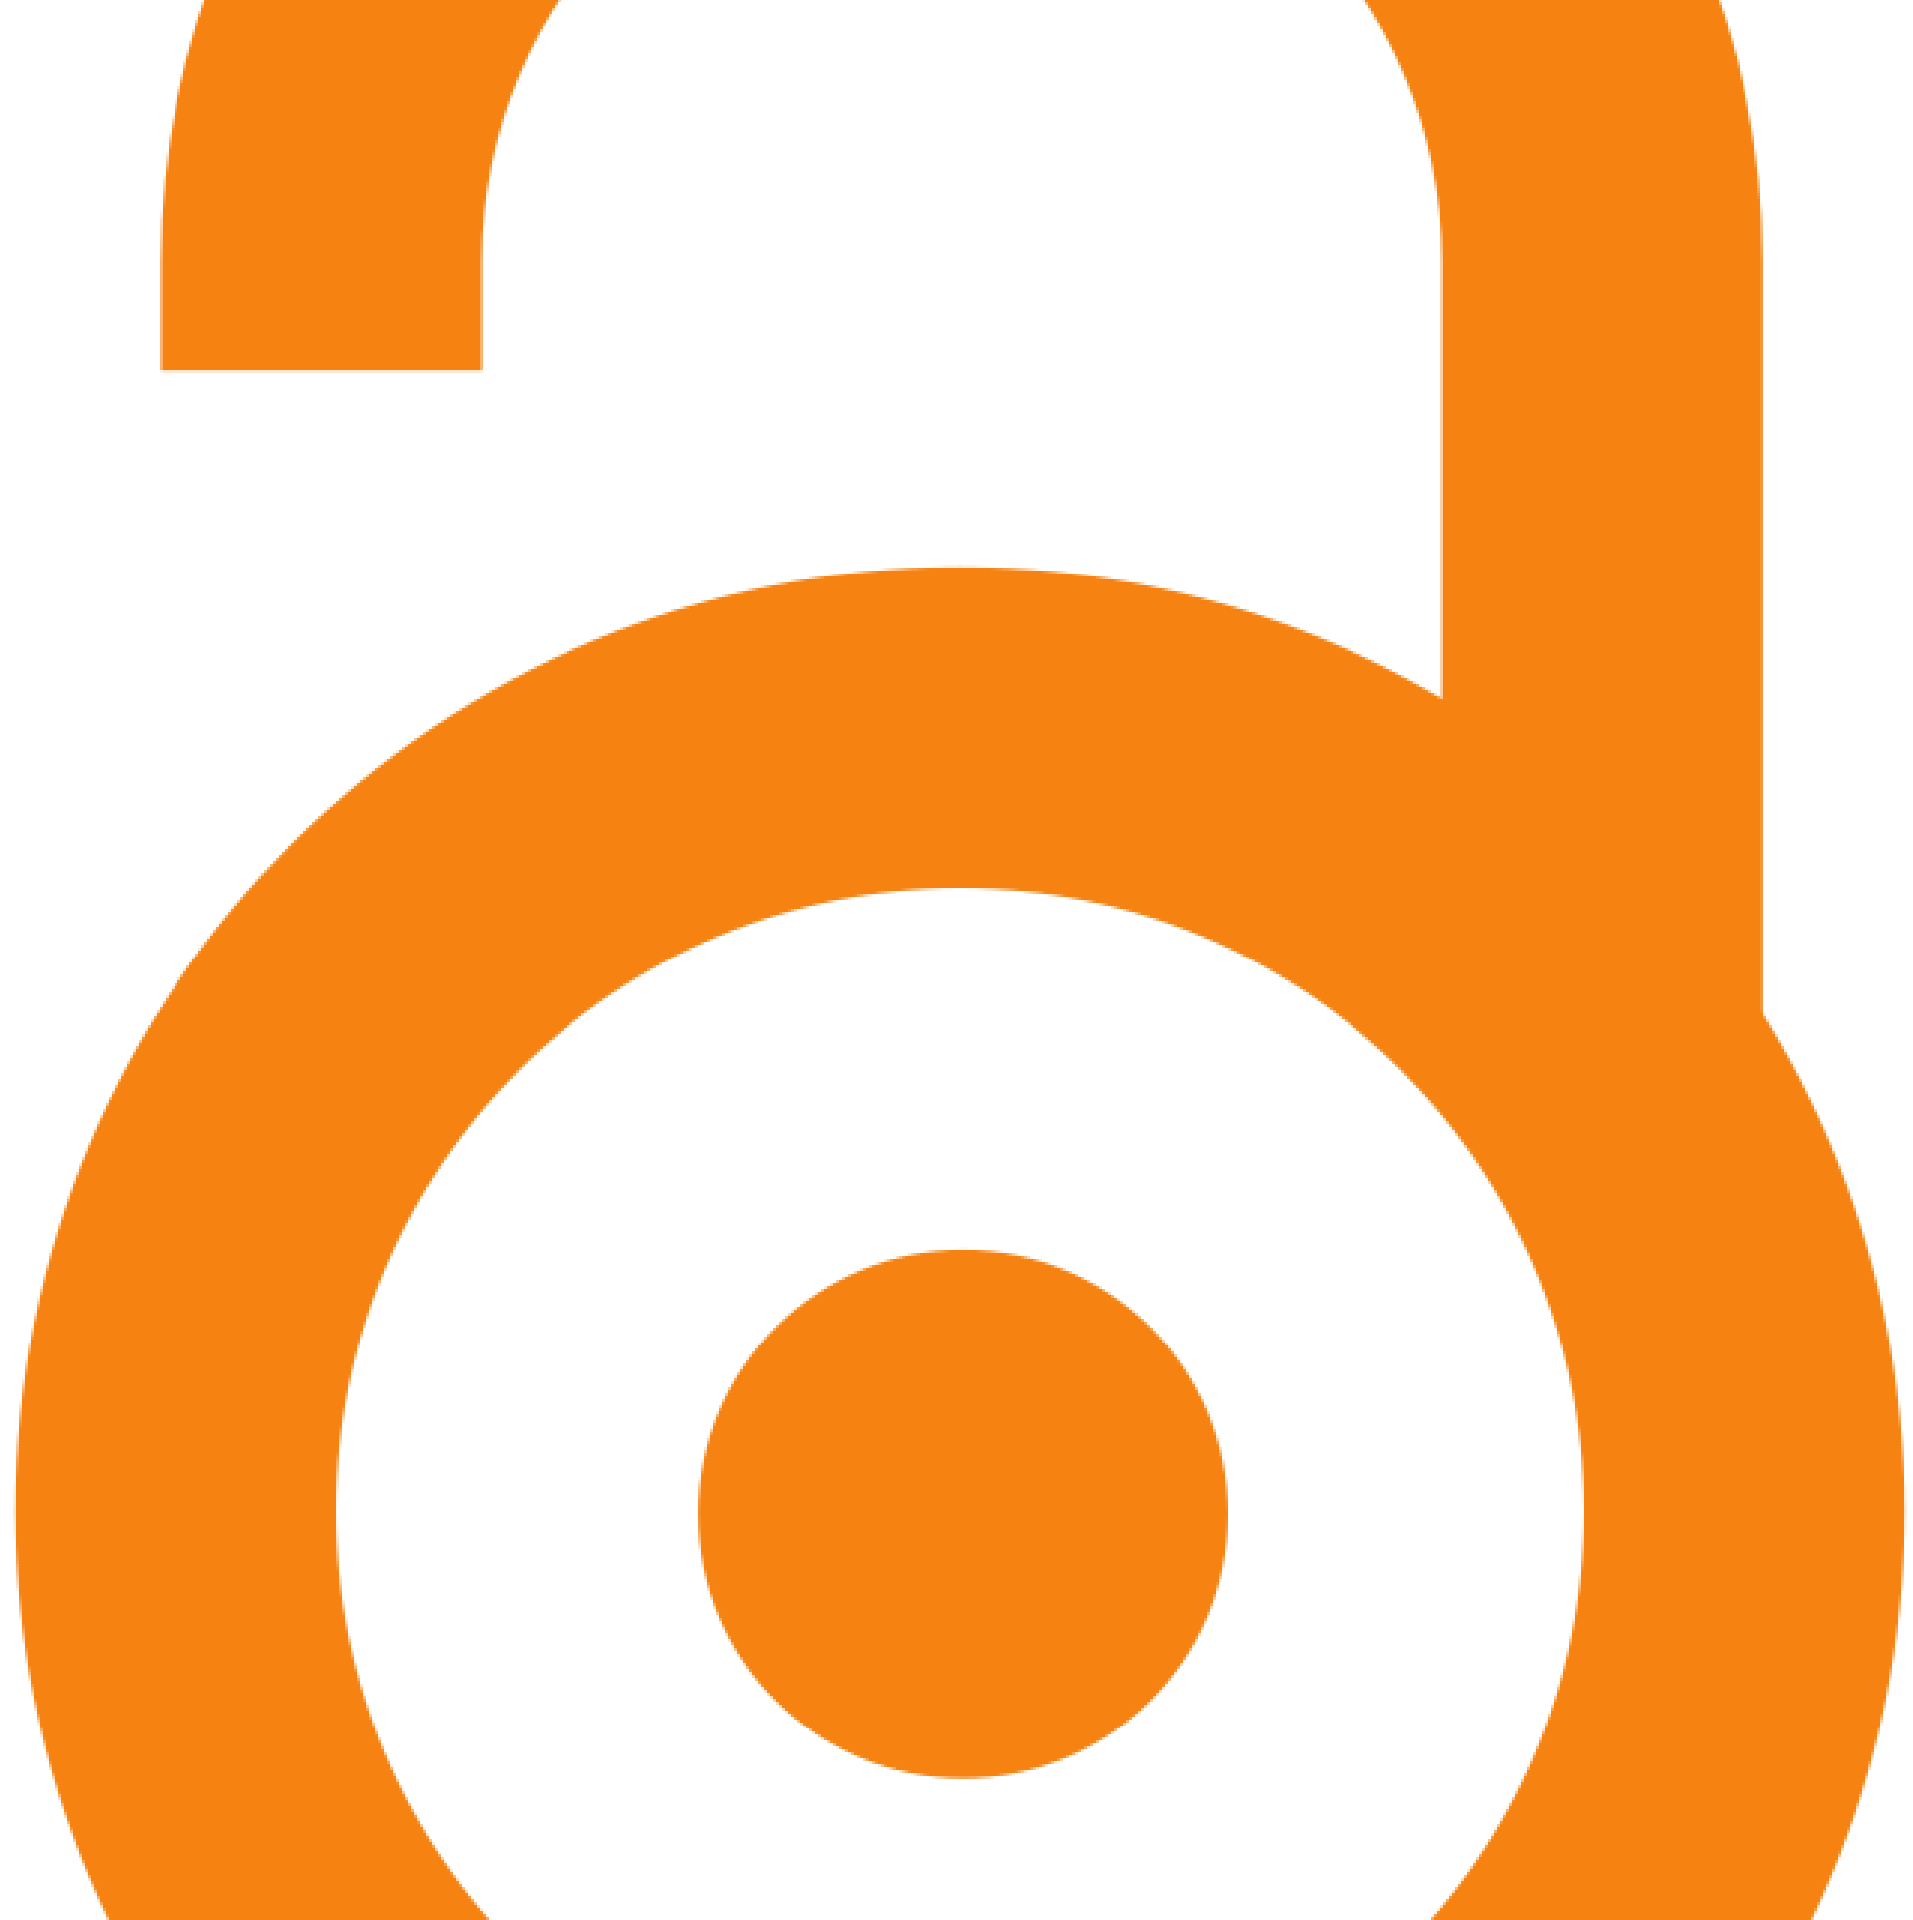

# Funding open access

- We will continue to provide annual OA block grants to UK organisations & research institutes, as well as our Africa & Asia Programmes
- Organisations to receive a block grant (and the level of funding) is determined by the amount research grant support provided to that organisation. See our website for details - <https://wellcome.org/grant-funding/guidance/organisations-in-receipt-open-access-funding>.
- Not based at an organisation in receipt of a block grant? We will supplement your research grant for eligible APCs. Email details to '[openaccess@wellcome.org](mailto:openaccess@wellcome.org)'.

# Use of the block grant

- ✓ Article Processing Charges (APCs) associated with fully OA journals & platforms
- ✓ APCs for Transformative journals
- ✓ 'Publish' element of Transformative Agreements
- ✓ PLOS Collective Action & Tiered Flat Fee Model
- ✓ APCs for articles published in subscription journals which have been submitted for publication **before** 1st January 2021.

# Transformative Agreements (TA)

- Must meet the requirements for transitional open access agreements as defined by JISC collections. See <https://subscriptionsmanager.jisc.ac.uk/about/publisher-information>.
- Agreement must ensure Wellcome-funded papers reporting original research are made open access, in line with our policy.
- Funds can be used to contribute towards the 'publish' element on an agreement. Contribution must be based on previous Wellcome APC spend with that publisher – using their methodology to calculate the publish element.
- The contribution can't exceed the balance remaining in the block grant.
- Organisations should set aside funds for publishing in fully OA journals/platforms.

## Further information

- Please use the **Q&A function** to ask your questions
- Post meeting, send questions to:  
[openaccess@wellcome.org](mailto:openaccess@wellcome.org)
- Slides available at Figshare – we will email you the link
